# Supplementary material for: Restoration of G1 chemo/radioresistance and double-strand-break repair proficiency by wild-type but not endonuclease-deficient Artemis
Source: PubMed Central journal article supplement — Nucleic Acids Res. 2011 Apr 29;39(15):6500–10. doi: 10.1093/nar/gkr257 (PMC3159448; doi:10.1093/nar/gkr257), 2011-04-29

**Supplemental Figure 1.** Normal human fibroblasts (48BR) express low levels of Artemis transcript. Artemis cDNA from Normal (48BR Vect) and HeLa cells was amplified using real time q-PCR as described for 40 cycles. 10  $\mu$ l from a 25  $\mu$ l reaction was run on 3% agarose gel with hyperladder 4 (Bioline) as reference. A specific amplification product 137 bp long was detected for both HeLa and 48BR Vect cells but not in CJ179 Vect cells.

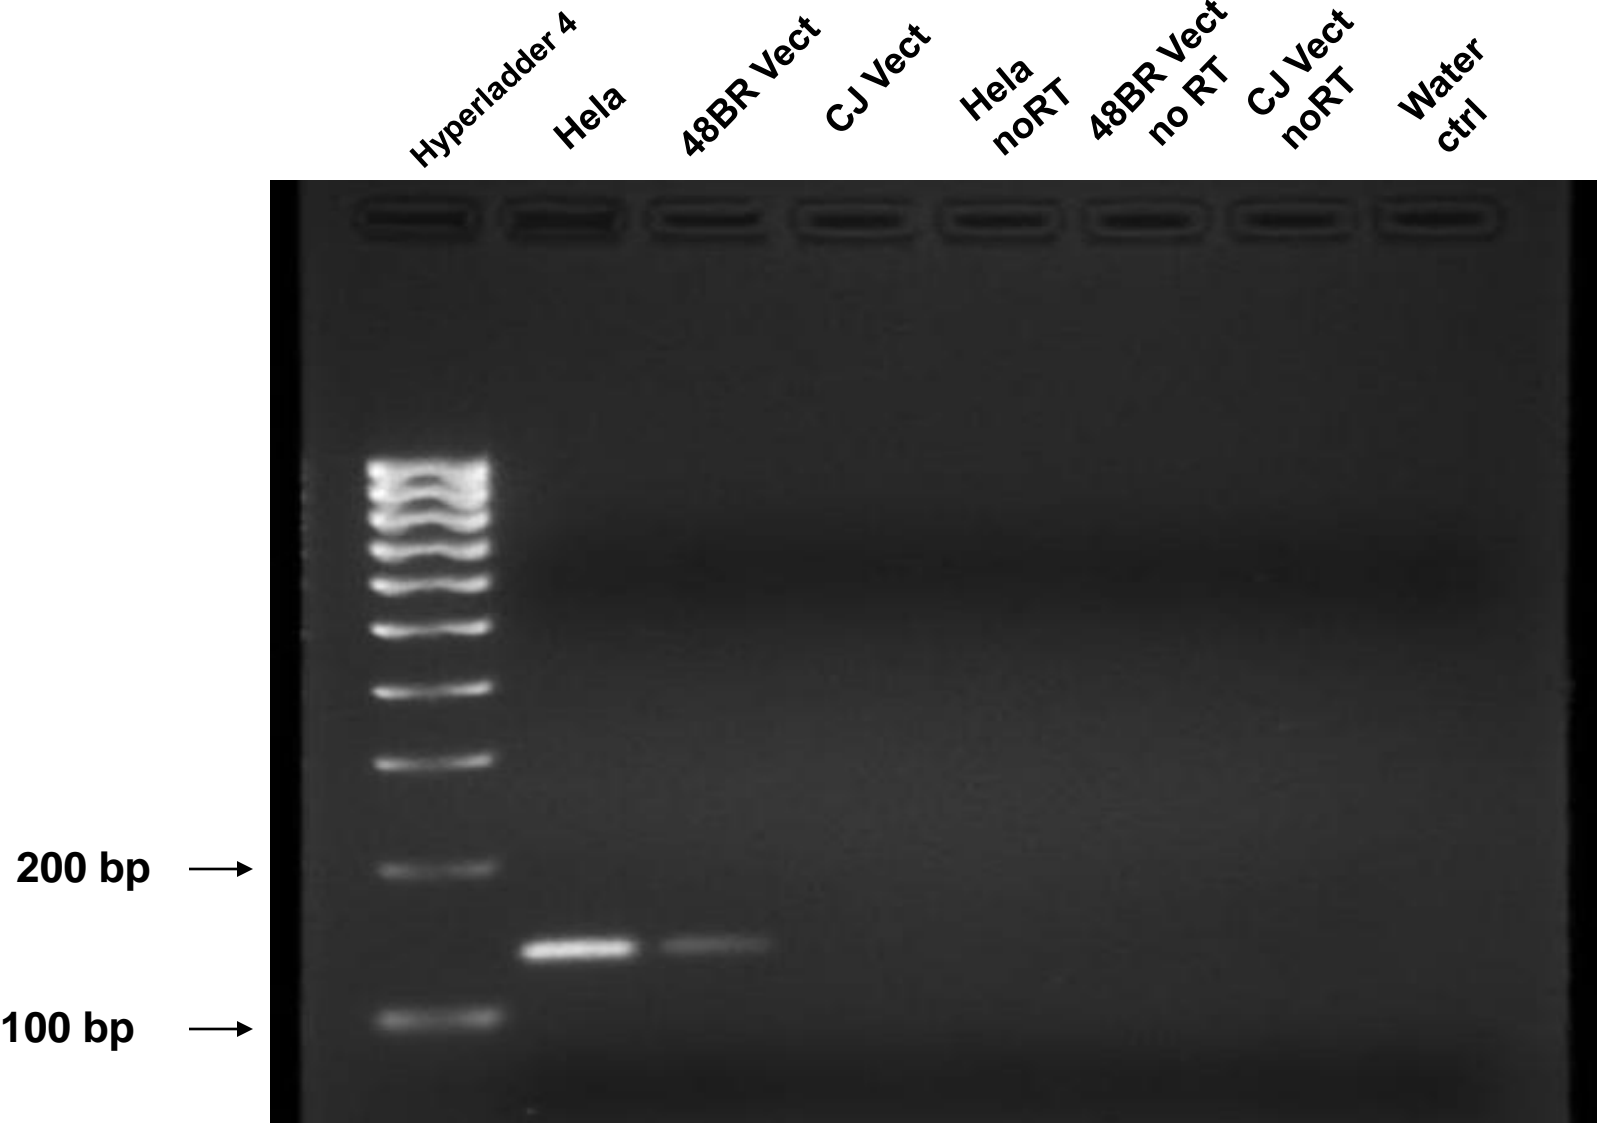

**Supplemental Figure 2.** Representative FACS plots of normal human fibroblasts (**A**) and Artemis deficient human fibroblasts (**B**) showing G1 arrest. Various cell lines were confluence arrested and serum starved (0.5% serum for 5 days) to synchronize them in G1 phase of cell cycle. Flow cytometric analysis to confirm cell cycle arrest was performed following Propidium iodide staining. Data was analysed using Modfit LT software. 90-95% cells were arrested in G1 phase of cell cycle for all cell lines.

**(2A)**

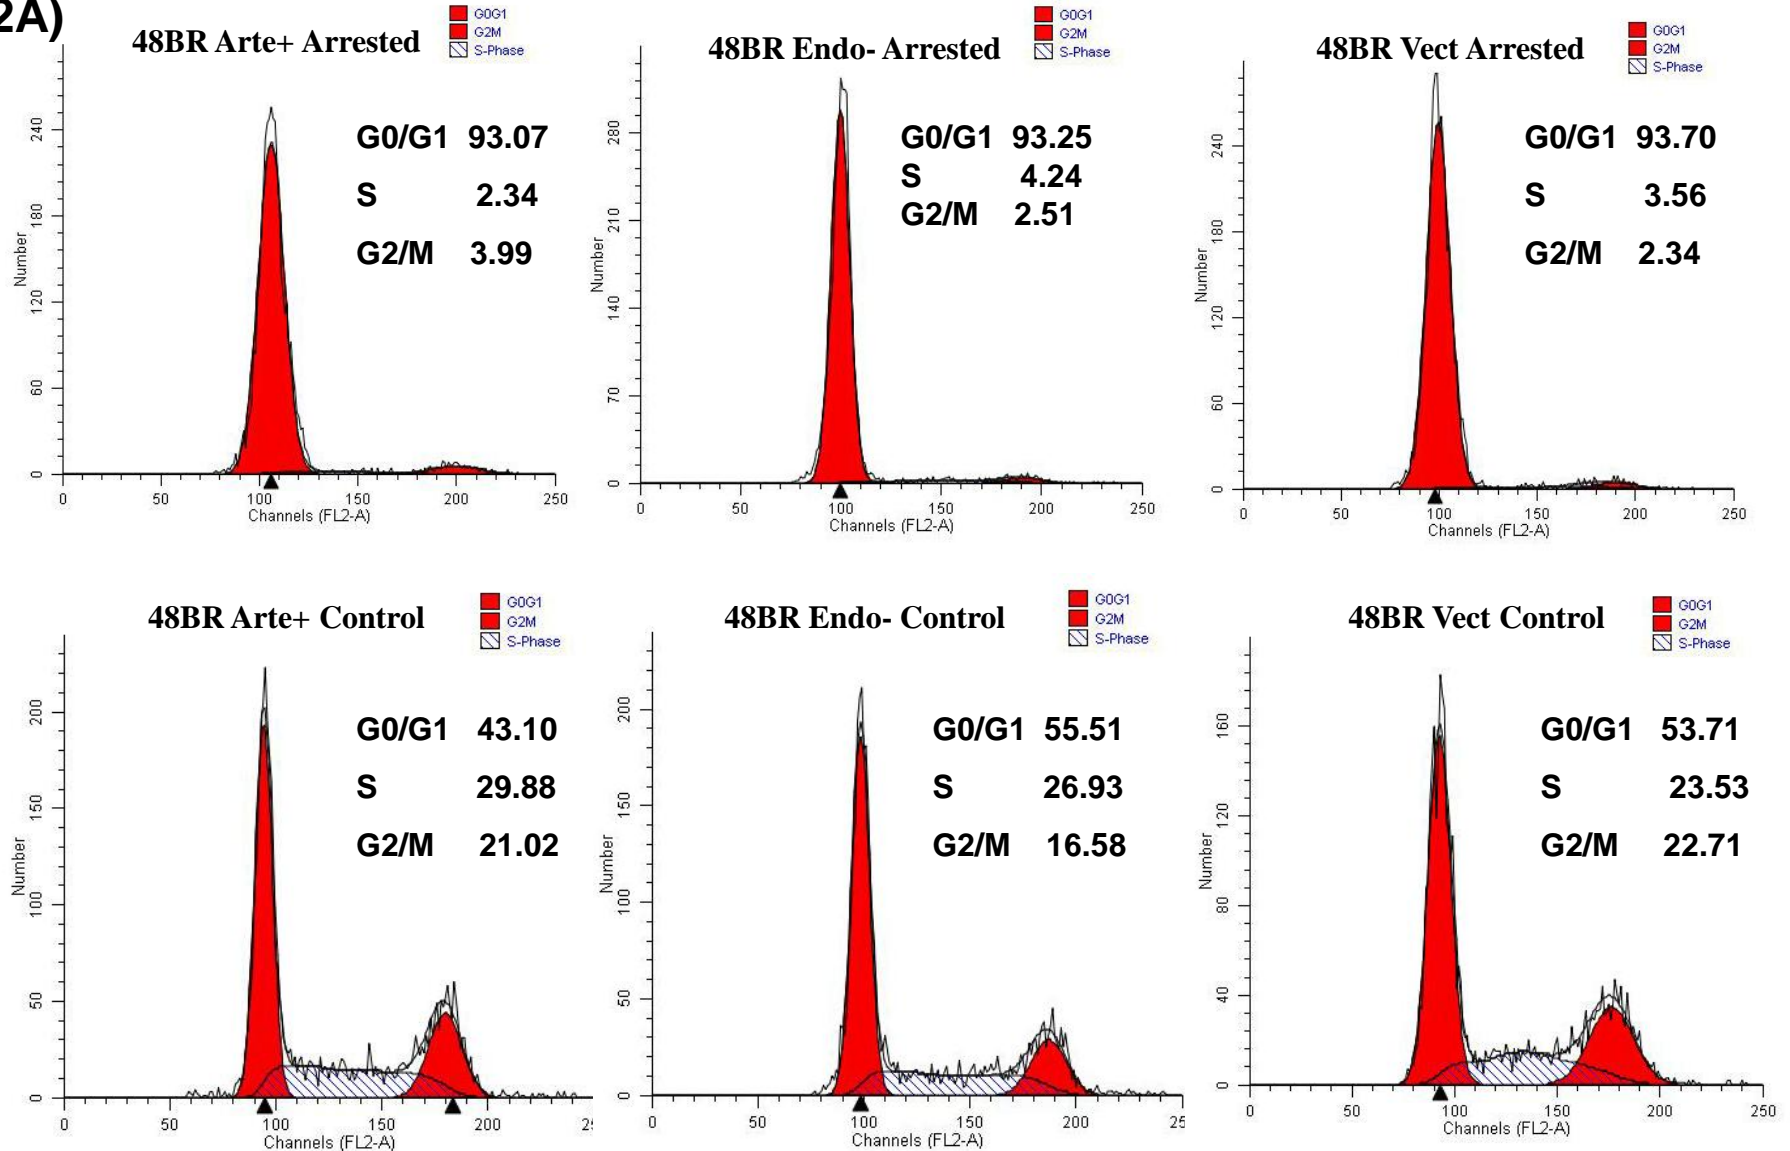

**(2B)**

**CJ Arte+ Arrested**

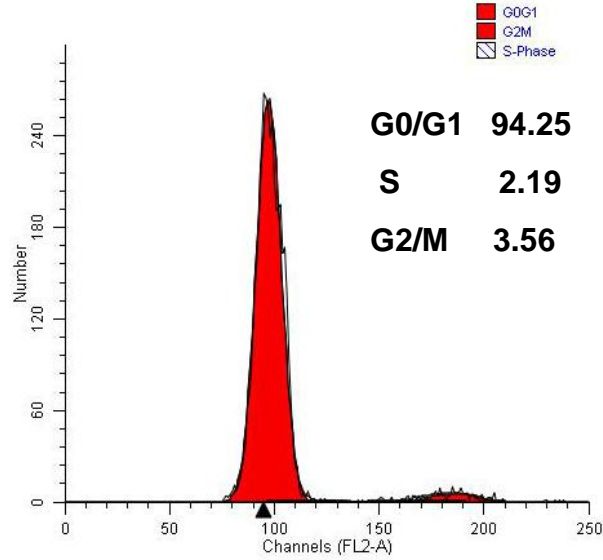

**CJ Endo- Arrested**

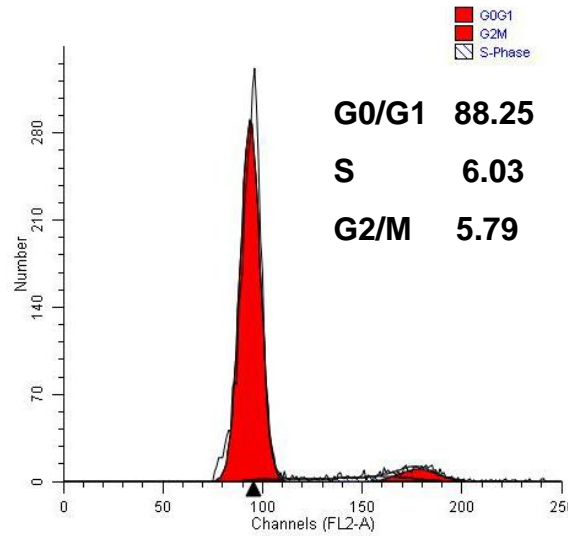

**CJ Vect Arrested**

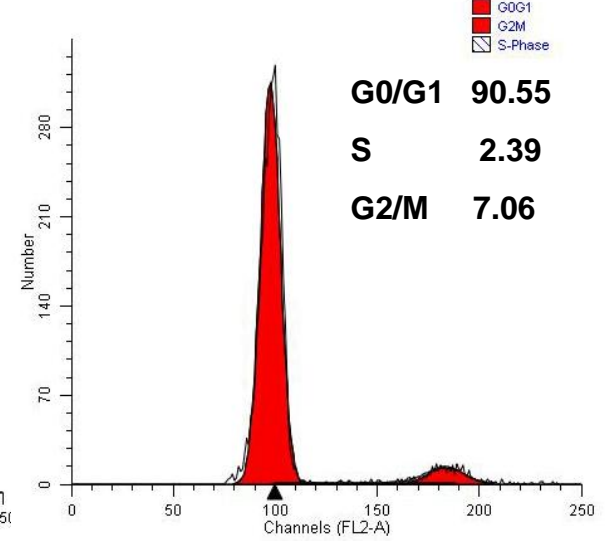

**CJ Arte+ Control**

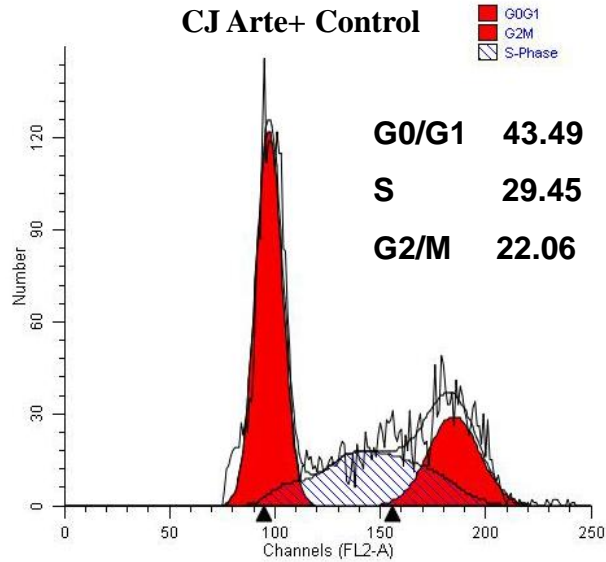

**CJ Endo- Control**

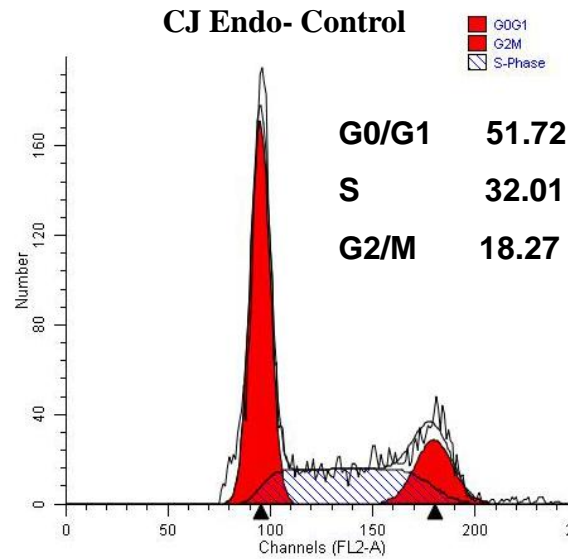

**CJ Vect Control**

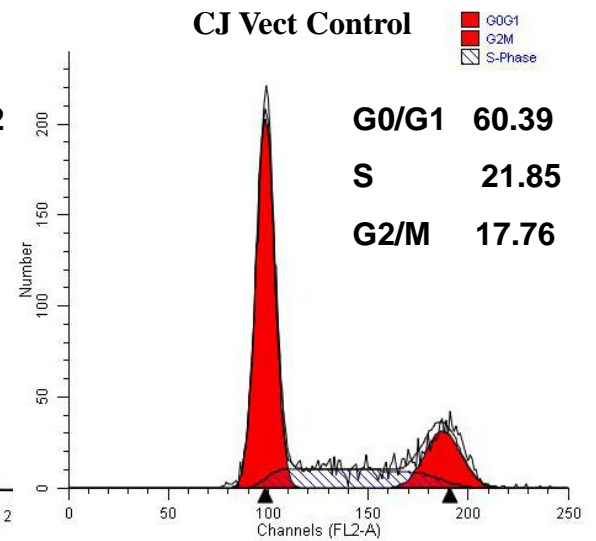

**Supplemental Figure 3.** Dependence of cellular DSB rejoining on Artemis endonucleolytic activity. Immunostaining was performed for phosphorylated  $\gamma$ -H2AX following exposure to 2Gy  $\gamma$ -radiation for the wildtype/D165N mutant Artemis expressing cell lines and the repair was followed at indicated times. Representative images for data quantified in Fig 2A are shown.

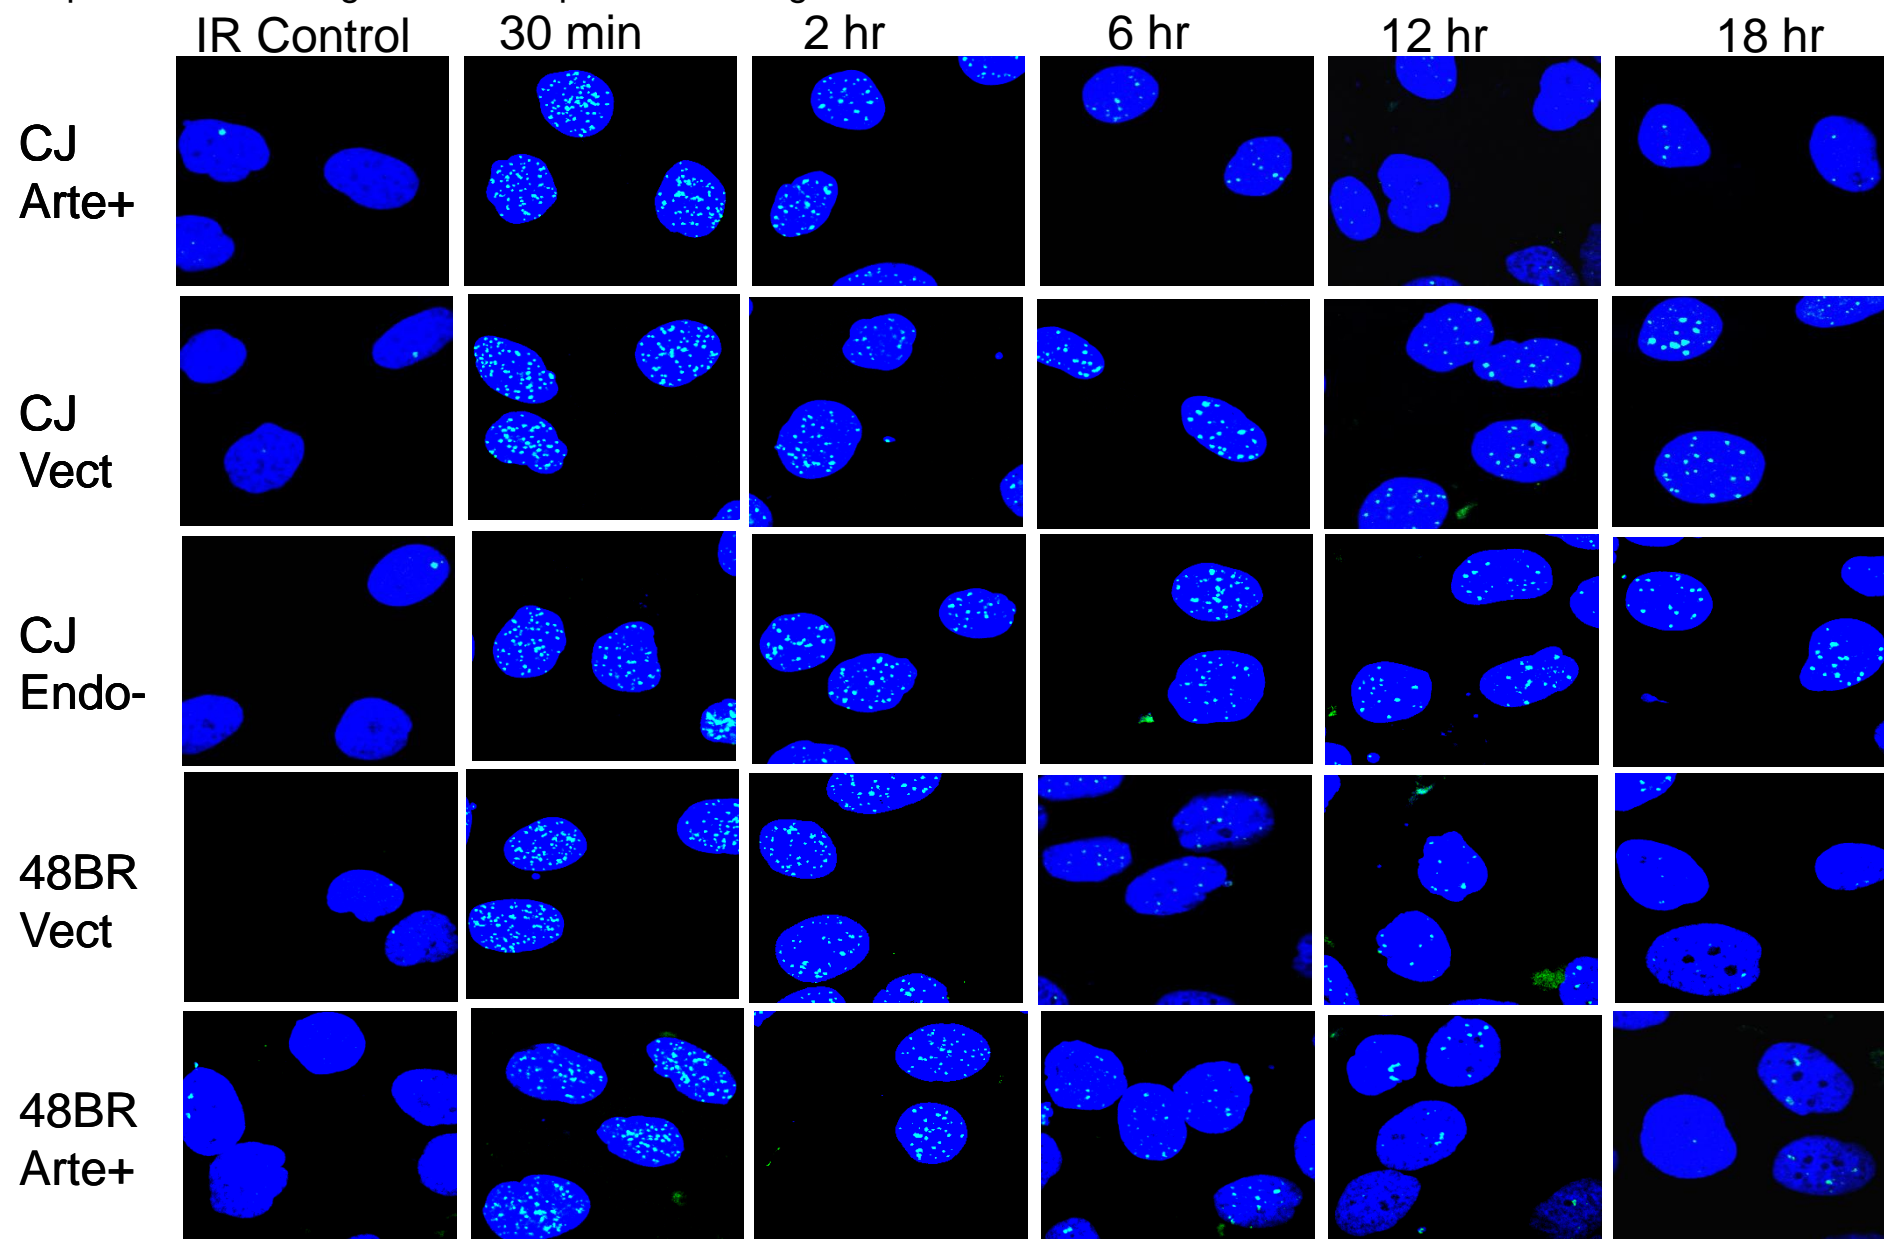

**Supplemental Figure 4 (A, B, C).** Mre11 and  $\gamma$ -H2AX co-localization following exposure to 2Gy  $\gamma$ -radiation. Double Mre11 :  $\gamma$ -H2AX staining was performed after paraformaldehyde fixation. Confocal analysis of representative cells, CJ Arte+ (A), CJ Vect (B) and CJ Endo<sup>-</sup> (C) are shown. Green fluorescence:  $\gamma$ -H2AX (monoclonal anti  $\gamma$ -H2AX, Millipore); red fluorescence: Mre11 (Polyclonal anti-hMre11 Novus biologicals).

**(4A)**

**CJ Arte+ (2Gy)**

**$\gamma$ -H2AX**

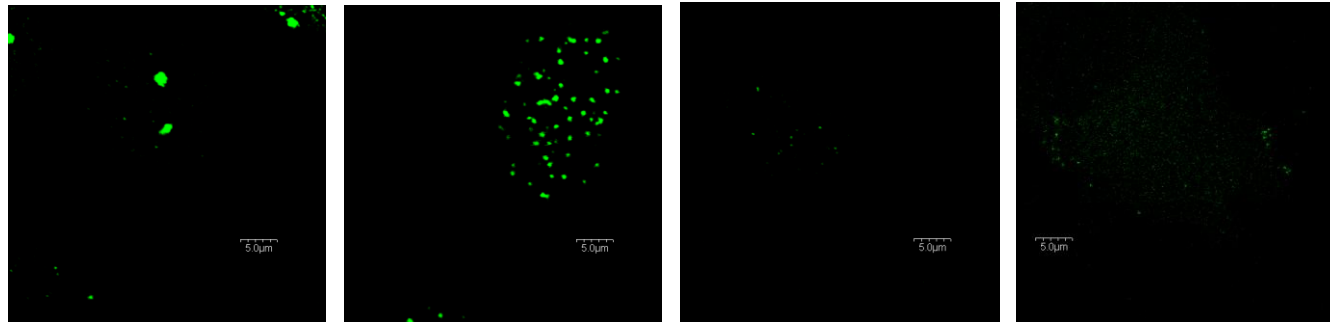

**hMre11**

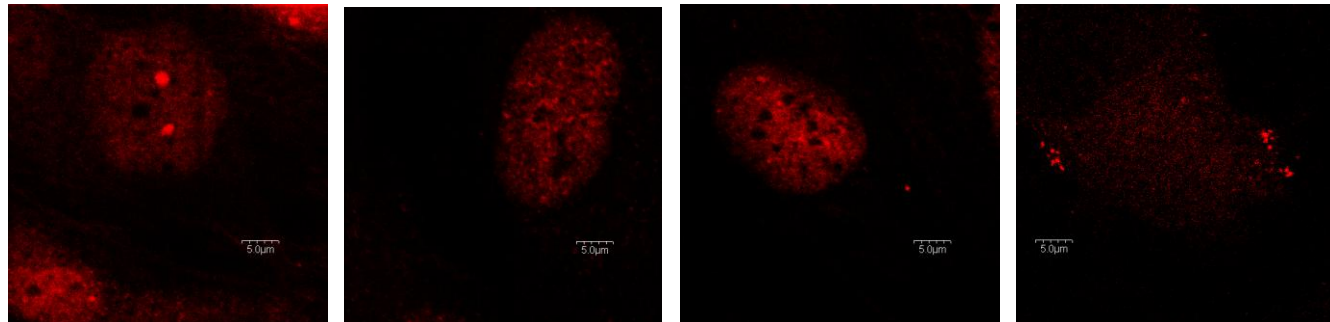

**Colocal-  
ization**

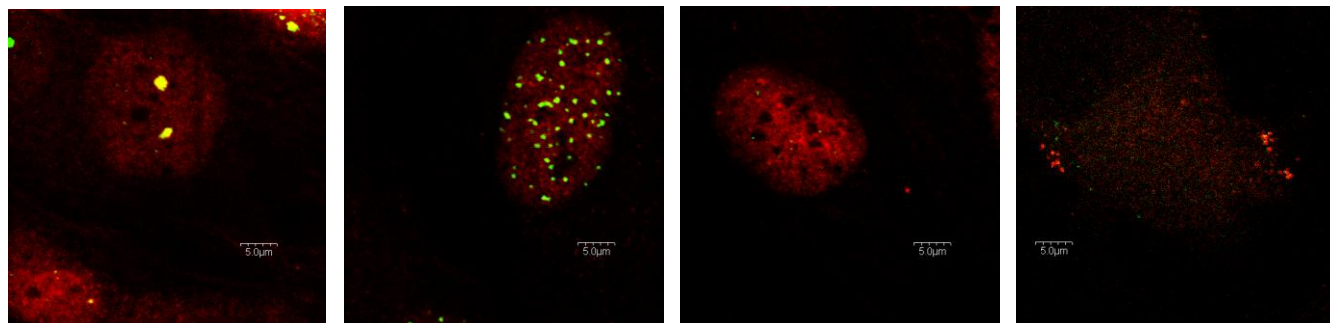

**IR Ctrl**

**0.5 hr**

**12 hr**

**18 hr**

**(4B)**

**CJ Vect (2Gy)**

**$\gamma$ -H2AX**

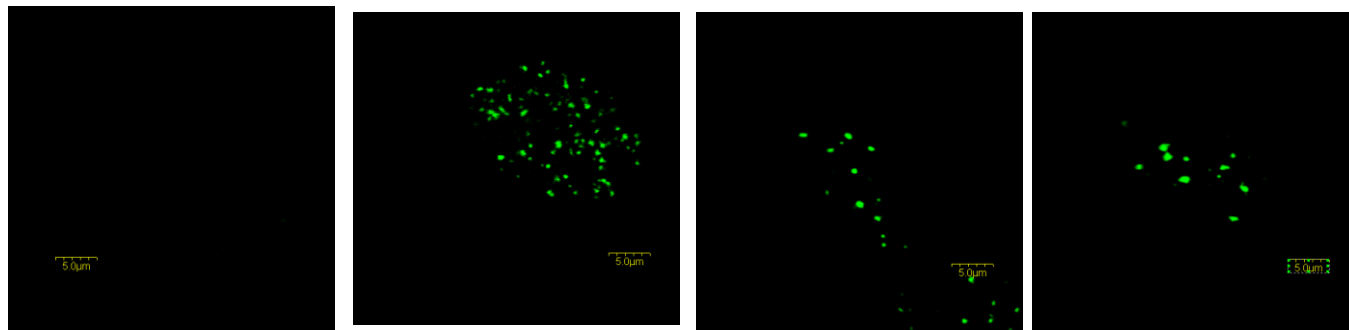

**hMre11**

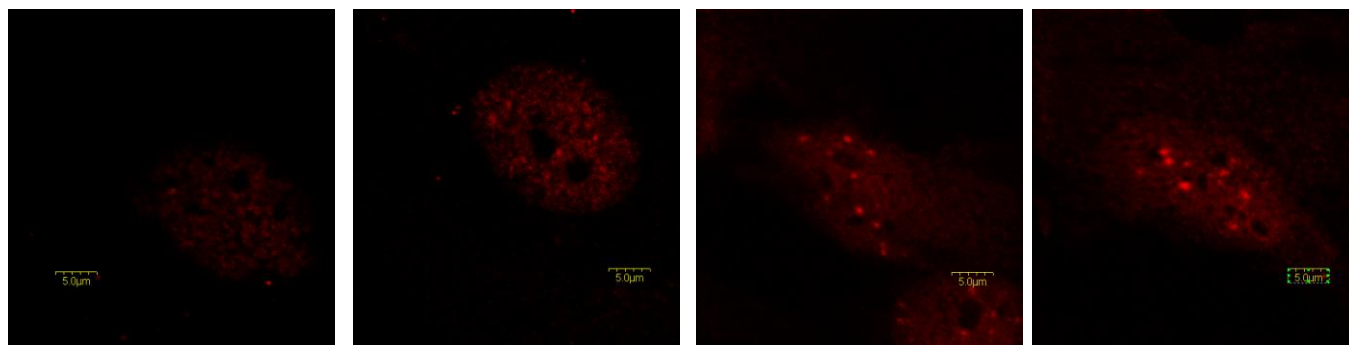

**Colocal-  
ization**

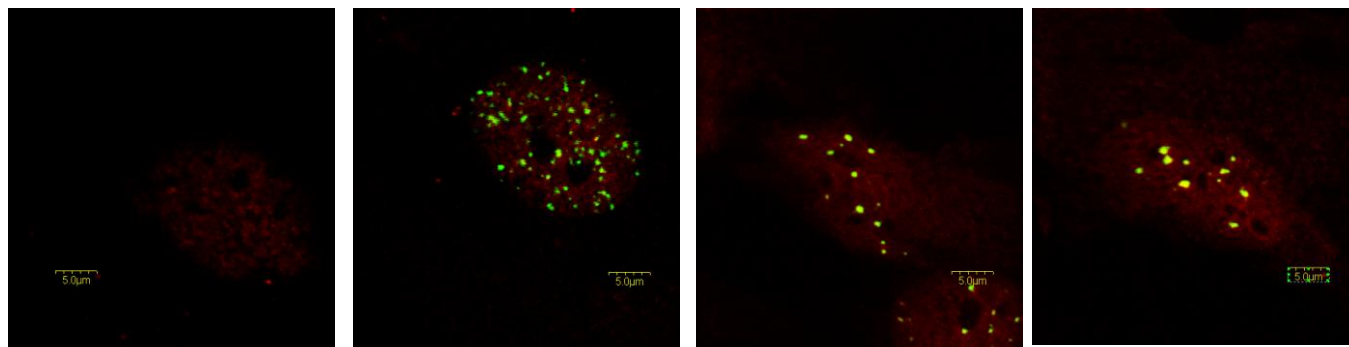

**IR Ctrl**

**0.5 hr**

**12 hr**

**18 hr**

**(4C)**

**CJ Endo<sup>-</sup> (2Gy)**

**$\gamma$ -H2AX**

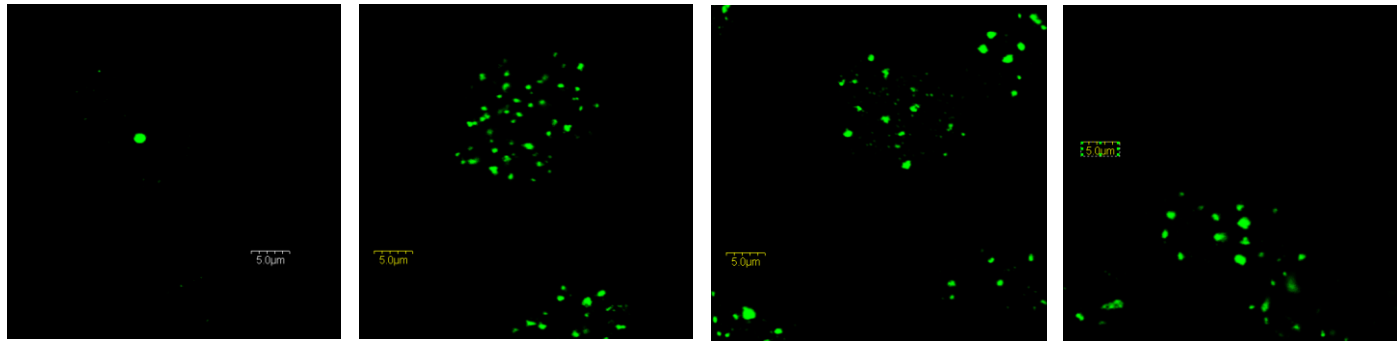

**hMre11**

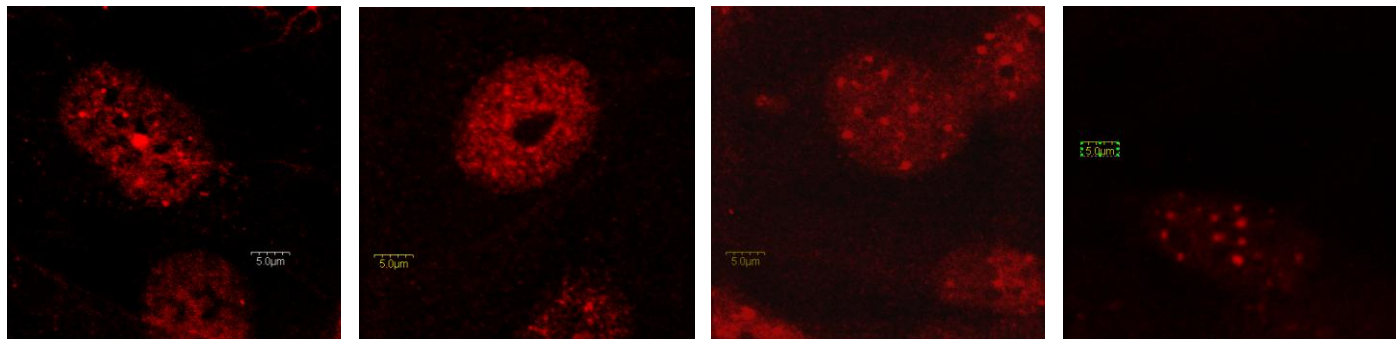

**Colocal-  
ization**

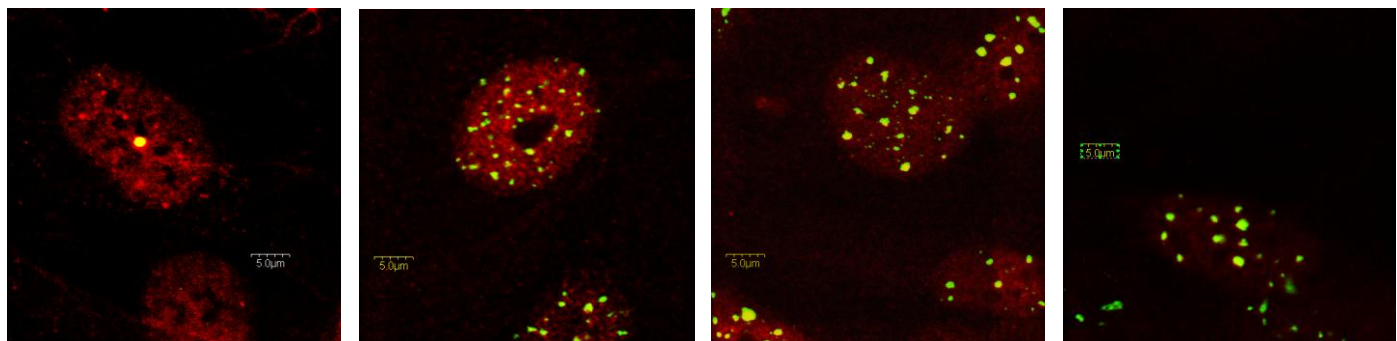

**IR Ctrl**

**0.5 hr**

**12 hr**

**18 hr**

**Supplemental Figure 5 (A, B, C).** PML and  $\gamma$ -H2AX partial co-localization and juxtapositioning following ionizing radiation exposure. Double PML:  $\gamma$ -H2AX staining was performed after paraformaldehyde fixation. Confocal analysis of representative cells, CJ Arte+ (**A**), CJ Vect (**B**) and CJ Endo<sup>-</sup> (**C**) are shown. Green fluorescence:  $\gamma$ -H2AX (polyclonal anti  $\gamma$ -H2AX, Novus biologicals); red fluorescence: PML (monoclonal anti-PML, Santa cruz, PGM-3).

**CJ Arte+ (2Gy)**

**(5A)**

**$\gamma$ -H2AX**

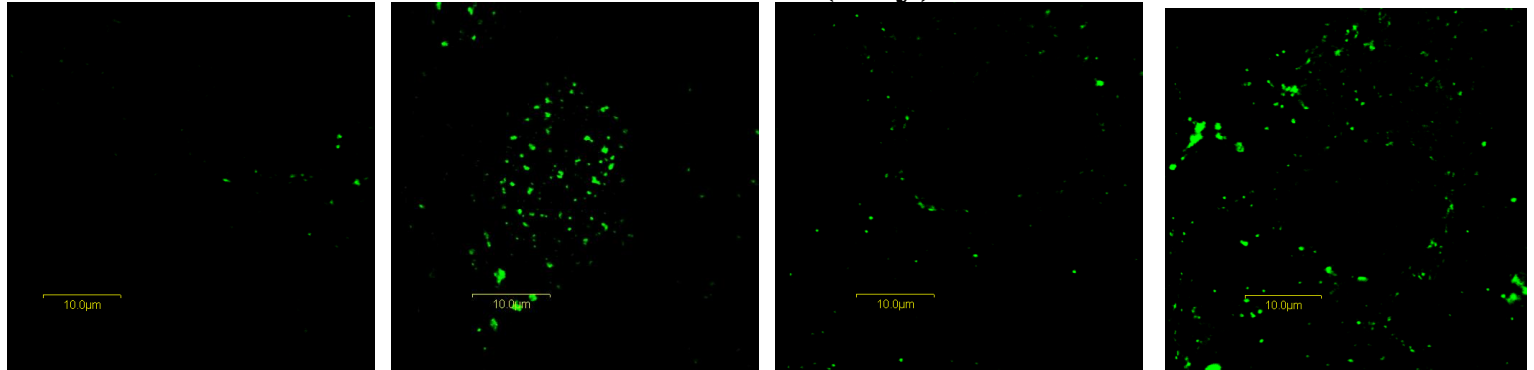

**PML**

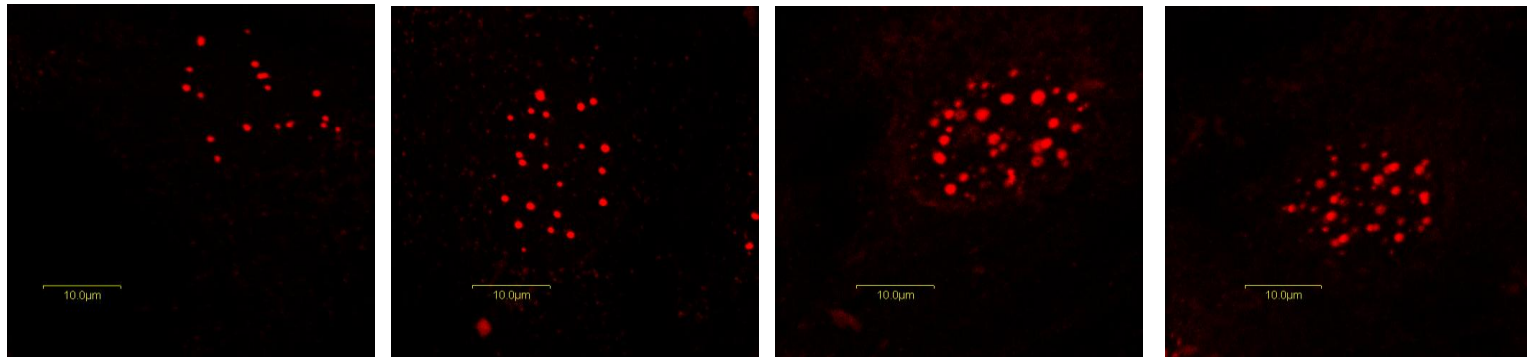

**Colocal-  
ization**

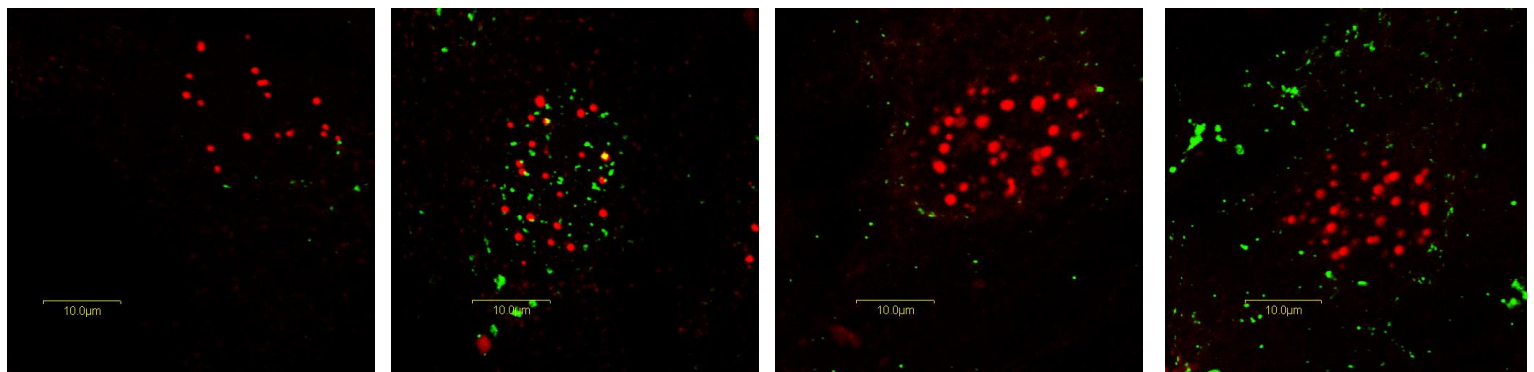

**IR Ctrl**

**0.5 hr**

**12 hr**

**18 hr**



**(5B)**

**CJ Vect (2Gy)**

**$\gamma$ -H2AX**

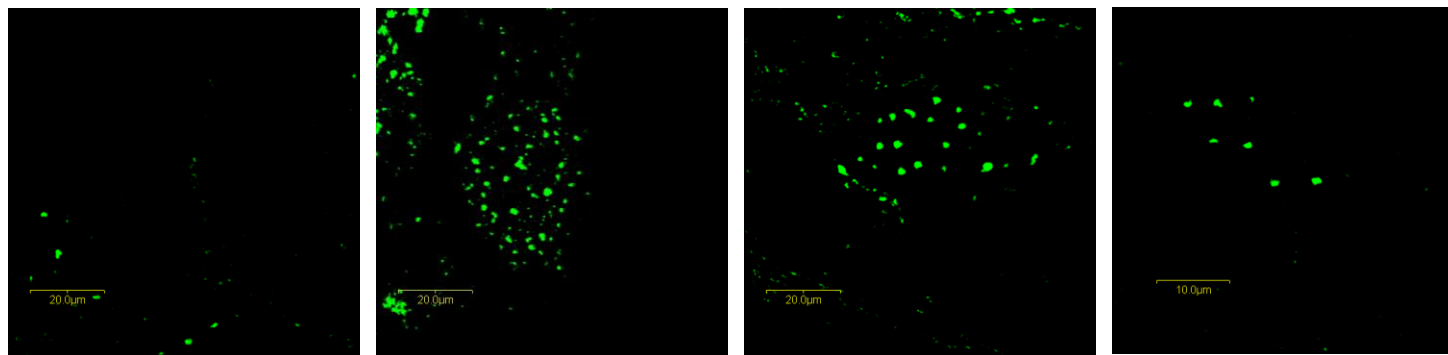

**PML**

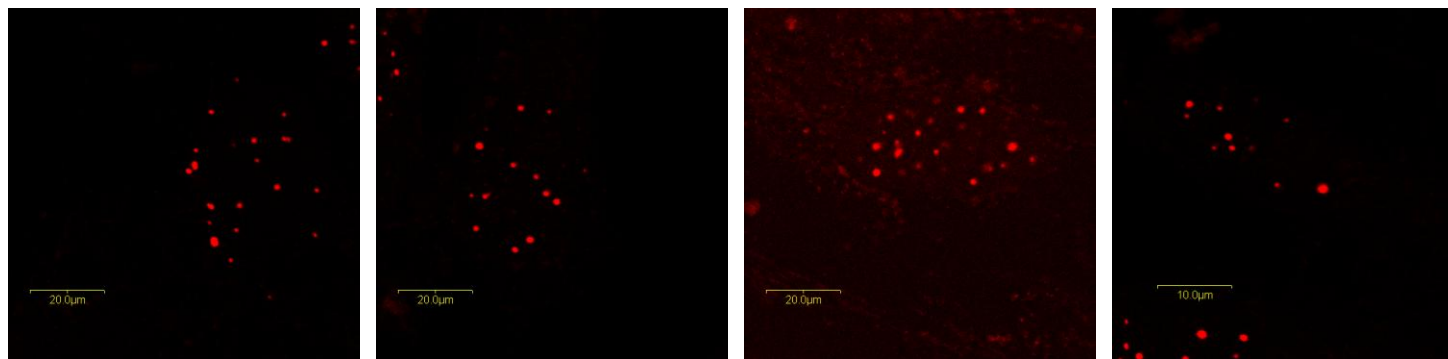

**Colocal-  
ization**

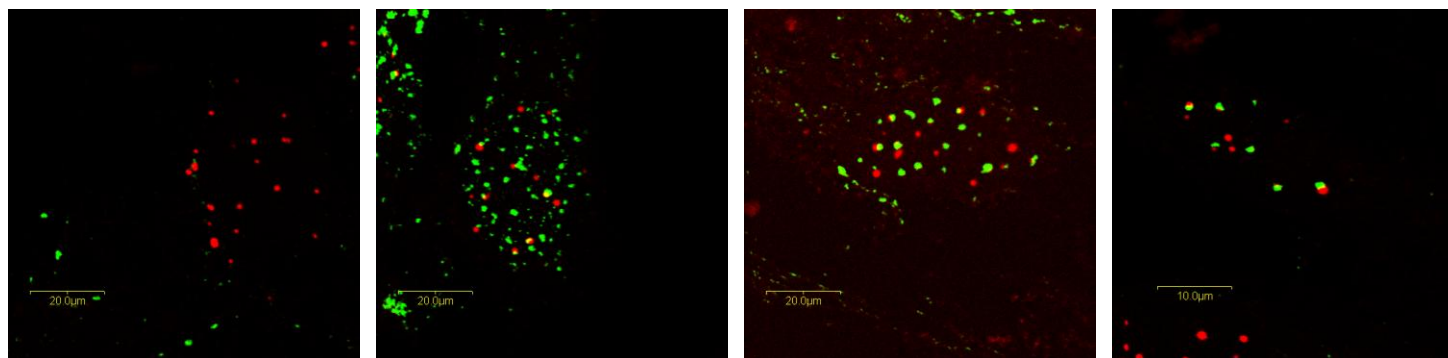

**IR Ctrl**

**0.5 hr**

**12 hr**

**18 hr**

**(5C)**

**CJ Endo<sup>-</sup> (2Gy)**

**$\gamma$ -H2AX**

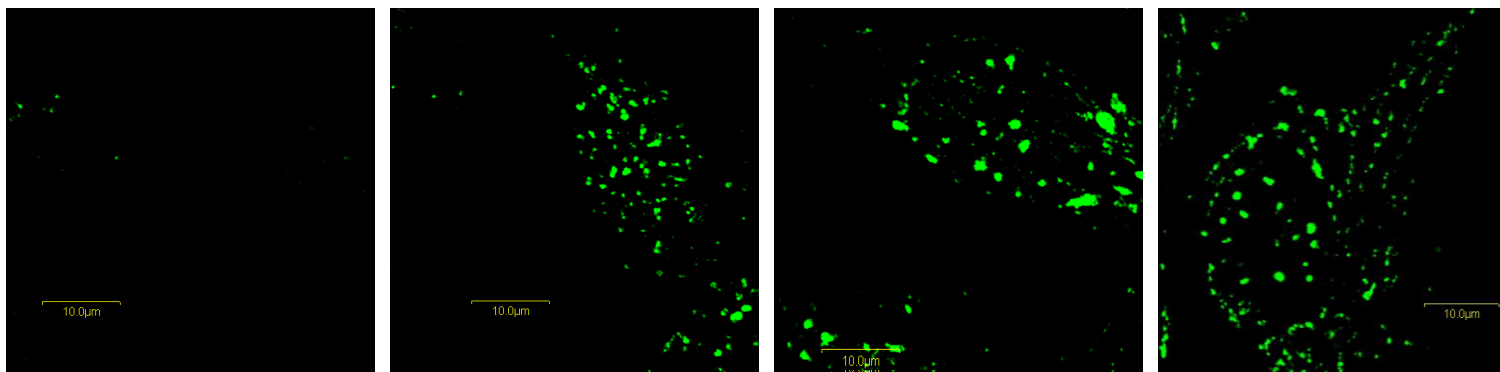

**PML**

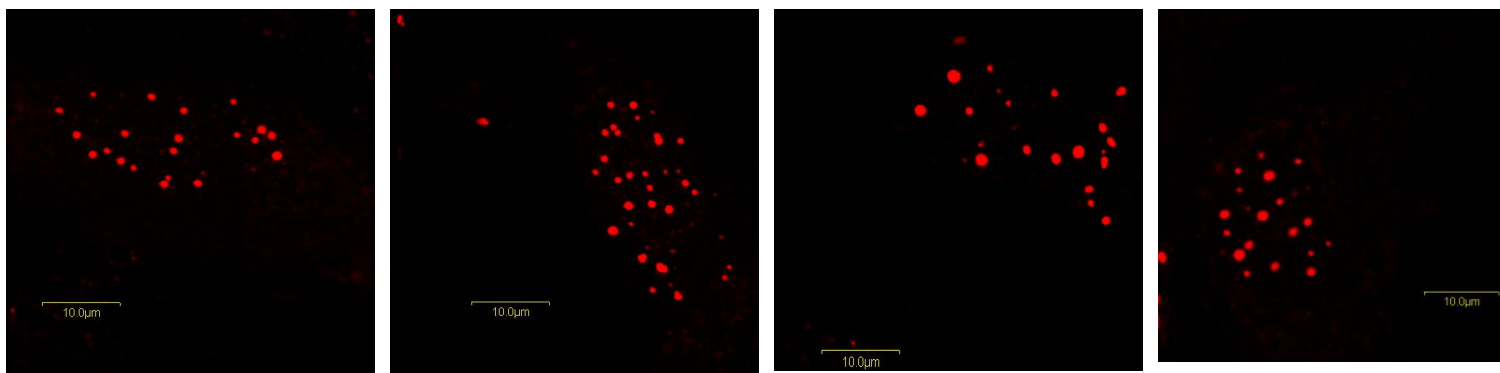

**Colocal-  
ization**

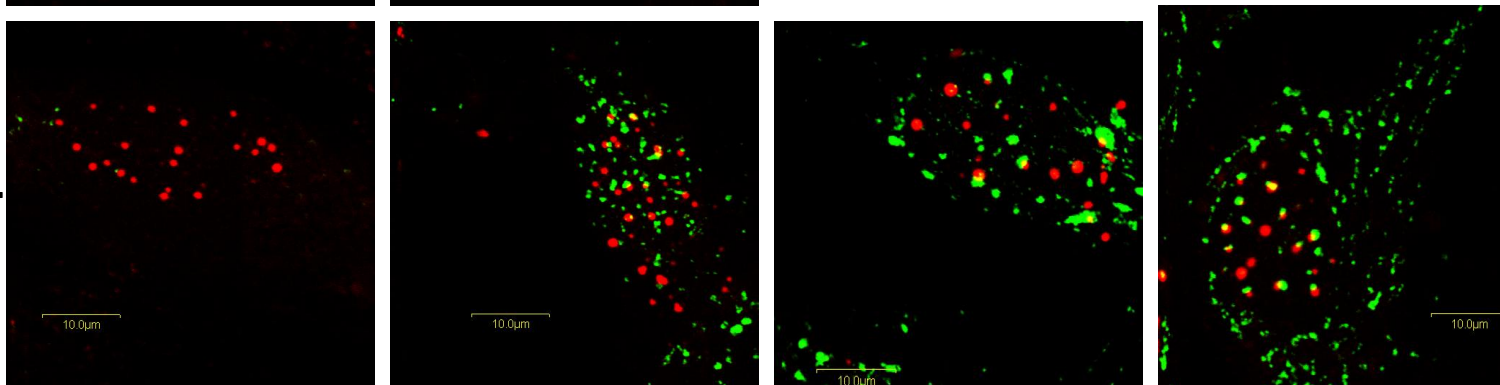

**IR Ctrl**

**0.5 hr**

**12 hr**

**18 hr**

**Supplemental Figure 6.** Overexpression of D165N Artemis has no effect on chemosensitivity of normal 48BR fibroblasts. Clonogenic survival was determined for confluence-arrested serum-starved cells overexpressing wild-type (Arte+) or endonuclease-deficient (Endo<sup>-</sup>) Artemis from a lentivirus (see Fig. 1), following treatment with bleomycin, or neocarzinostatin. Vect cells are empty-vector controls. Although survival of 48BR Endo<sup>-</sup> cells was slightly lower than that of Vect cells following bleomycin treatment, the difference was not statistically significant. For bleomycin treatment, p = 0.56, 48BR Vect vs 48BR Endo<sup>-</sup> (1 μg/ml, t test), p = 0.49, 48BR Vect vs 48BR Endo<sup>-</sup> (2 μg/ml, t test). For NCS treatment, p = 0.62, 48BR Vect vs 48BR Endo<sup>-</sup> (3 nM, t test), p = 0.93, 48BR Vect vs 48BR Endo<sup>-</sup> (6 nM, t test).

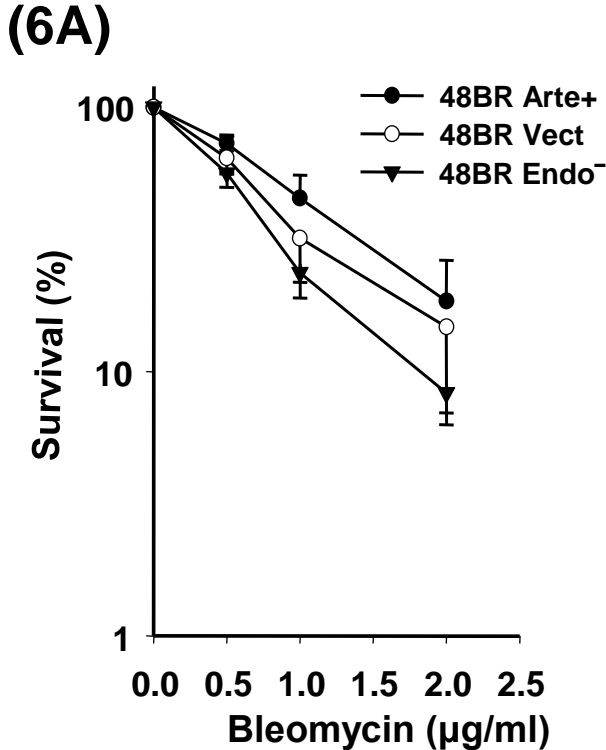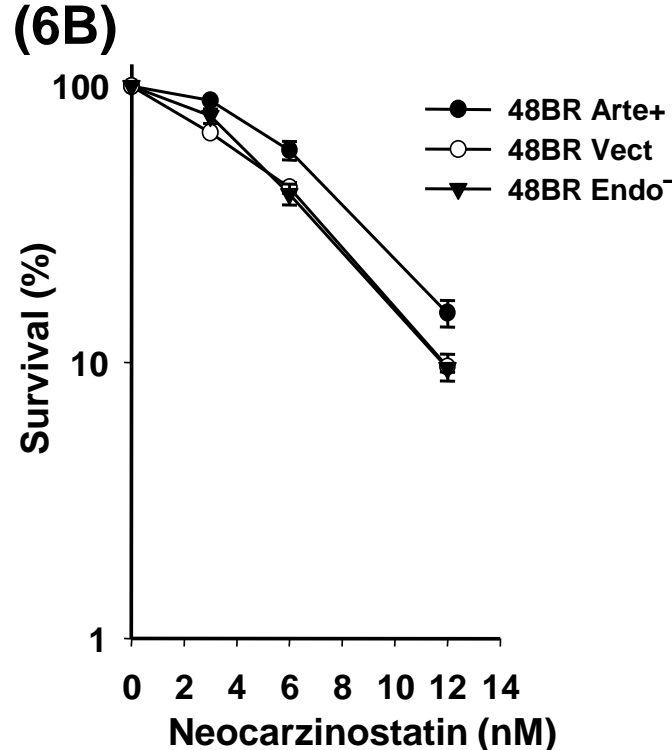

Supplement: supp_gkr257_nar-00645-d-2011-File003.pdf [file supp_gkr257_nar-00645-d-2011-File003.pdf]
